# Supplementary material for: Fstl1 is involved in the regulation of radial glial scaffold development
Source: Springer Nature journal article supplement (doi:10.1186/s13041-015-0144-8), 2015-09-16

**Fstl1<sup>+/+</sup>**

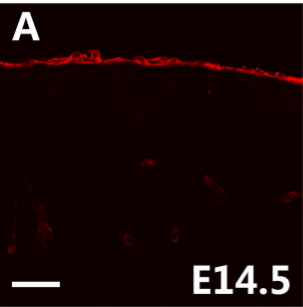

**Fstl1<sup>-/-</sup>**

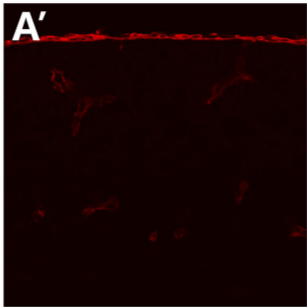

Supplement: MOESM2 [file 25663052]
